# Supplementary material for: Two-photon all-optical neurophysiology for the dissection of larval zebrafish brain functional and effective connectivity
Source: PubMed Central journal article supplement — Commun Biol. 2024 Oct 4;7:1261. doi: 10.1038/s42003-024-06731-3 (PMC11452506; doi:10.1038/s42003-024-06731-3), 2024-10-04
Supplement: 42003_2024_6731_MOESM3_ESM.pdf [file 42003_2024_6731_MOESM3_ESM.pdf]

## Description of Additional Supplementary Files

File name: Supplementary Data 1

Description: Granger causality analysis results

File name: Supplementary Data 2

Description: Partial correlation analysis results

File name: Supplementary Data 3

Description: Source data behind the graphs in the paper

File name: Supplementary Movie 1.

Description: Larval zebrafish brain imaging with 2P LSM

File name: Supplementary Movie 2.

Description: Expression patterns of the double transgenic *Tg(elavl3:H2B-GCaMP6; elavl3:ReaChR-TagRFP)* zebrafish line .

File name: Supplementary Movie 3.

Description: ReaChR<sup>-</sup> larval zebrafish in tail-free preparation during whole-brain imaging OFF and ON.

File name: Supplementary Movie 4.

Description: ReaChR<sup>+</sup> larval zebrafish in tail-free preparation during whole-brain imaging OFF and ON.

File name: Supplementary Movie 5.

Description: Raw timelapse acquisition of whole-brain imaging during optogenetic stimulation of the left habenula.

File name: Supplementary Movie 6.

Description: 3D rotation of whole-brain activation probability map in response to left habenula stimulation.

File name: Supplementary Movie 7.

Description: Volumetric activation probability maps of individual larvae in response to left habenula stimulation.

File name: Supplementary Movie 8.

Description: Volumetric correlation maps of individual larvae.

File name: Supplementary Movie 9.

Description: 3D rotation of whole-brain functional connectivity of the left habenula.
